# Supplementary material for: A Randomized Trial of Multivitamin Supplements and HIV Disease Progression and Mortality
Source: Atypon-hosted journal article supplement (doi:10.1056/nejmoa040541), 2004-06-30

# Supplementary Appendix 1

This appendix has been provided by the authors to give readers additional information about their work.

Supplement to: Fawzi WW, Msamanga GI, Spiegelman D, et al. A randomized trial of multivitamin supplements and HIV disease progression and mortality. *N Engl J Med* 2004;351:23-32.

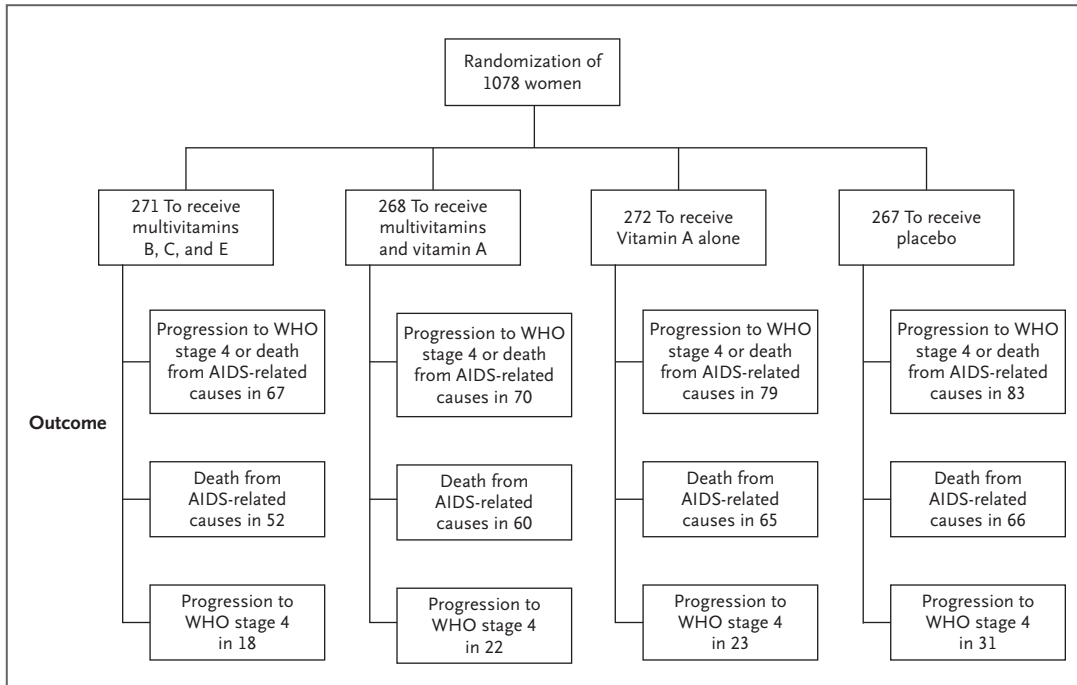

Supplement: nejm_fawzi_23sa1.pdf [file nejm_fawzi_23sa1.pdf]
